# Supplementary material for: Genome-Wide Identification of GAST Family Members and Their Potential Roles in Epicotyl Dormancy in Chinese Cork Oak (Quercus variabilis)
Source: MDPI journal article supplement (doi:10.3390/plants13091247), 2024-04-30
Supplement: s1 [file s1]

## Supplementary Information

**Table S1** Analysis of physicochemical properties of members of *GAST* gene family in Chinese cork oak

| Gene ID          | Gene name       | Number of Amino Acid/aa | Molecular Weight/KDa | Isoelectric point | Instability Index | Aliphatic Index | Grand Average of Hydropathicity |
|------------------|-----------------|-------------------------|----------------------|-------------------|-------------------|-----------------|---------------------------------|
| QV_Chr02G01770.1 | <i>QvGAST1</i>  | 88                      | 9.65                 | 8.71              | 32.73             | 57.61           | -0.080                          |
| QV_Chr02G01780.1 | <i>QvGAST2</i>  | 88                      | 9.63                 | 8.71              | 35.45             | 57.61           | -0.045                          |
| QV_Chr02G07160.1 | <i>QvGAST3</i>  | 144                     | 15.63                | 9.59              | 49.08             | 80.00           | 0.110                           |
| QV_Chr02G18590.1 | <i>QvGAST4</i>  | 111                     | 12.35                | 9.56              | 53.17             | 69.64           | -0.366                          |
| QV_Chr02G34760.1 | <i>QvGAST5</i>  | 194                     | 20.73                | 9.52              | 76.94             | 49.02           | -0.418                          |
| QV_Chr02G34800.1 | <i>QvGAST6</i>  | 171                     | 18.69                | 9.18              | 91.75             | 47.89           | -0.602                          |
| QV_Chr03G22170.1 | <i>QvGAST7</i>  | 105                     | 11.62                | 9.32              | 44.22             | 76.00           | -0.063                          |
| QV_Chr06G17900.1 | <i>QvGAST8</i>  | 96                      | 10.45                | 8.68              | 28.90             | 68.02           | 0.100                           |
| QV_Chr08G16600.1 | <i>QvGAST9</i>  | 88                      | 9.62                 | 8.42              | 52.16             | 45.57           | -0.251                          |
| QV_Chr10G05310.1 | <i>QvGAST10</i> | 109                     | 12.07                | 8.61              | 46.66             | 74.22           | -0.032                          |

**Table S2** Oligonucleotide primer sequences used for qRT-PCR and in Chinese cork oak experiments

| Gene name       | Forward primer              | Reverse primer                 |
|-----------------|-----------------------------|--------------------------------|
| <i>QvActin7</i> | 5' ACAGTGTCTGGATCGGAGGA 3'  | 5' GGACCACTCTCGTCGTACTC 3'     |
| <i>QvGAST1</i>  | 5' TCCTGCTTGTTTGCCTTGTC 3'  | 5' ACTTCTCACAGCAAACACCG 3'     |
| <i>QvGAST2</i>  | 5' AATGGCTGGTTCAAGCTTCT 3'  | 5' CTCTTGCCCTTGGAGTTCTT 3'     |
| <i>QvGAST3</i>  | 5' CAGCCATGACCATCTCAAAG 3'  | 5' ACAGGTTTGGCCTAGACGAT 3'     |
| <i>QvGAST4</i>  | 5' TGGATGAAGGGGAAAACGAAC 3' | 5' GCGTTCTTGTTGCCATAGGT 3'     |
| <i>QvGAST5</i>  | 5' TTCAGAGATGCCGCTTAGCT 3'  | 5' GCACTTGTATCTTTTGCCGTG 3'    |
| <i>QvGAST6</i>  | 5' TCCCACCTTATGCACCACCT 3'  | 5' TGGCATCTCTGATCACATCTG 3'    |
| <i>QvGAST7</i>  | 5' TTTGCCTTTCGTGGACTGTG 3'  | 5' AGCACCTCCCACACATTTCT 3'     |
| <i>QvGAST8</i>  | 5' TTGTGACTCCAAATGCGGTG 3'  | 5' TGCCCTTGGAGTTCAACTTG 3'     |
| <i>QvGAST9</i>  | 5' CAACCTATGCTGTGCGAAGT 3'  | 5' TCCTCCTTCCTTAGTTTTTCCAGT 3' |
| <i>QvGAST10</i> | 5' TTGGGGGCTTTATTCTTCTG 3'  | 5' AAGTTTGGCCTCGAGTGAAG 3'     |
